# Supplementary material
Source: PubMed Central journal article supplement (PMC2810546)
Supplement: NIHMS166828-supplement-Supp1.pdf [file NIHMS166828-supplement-Supp1.pdf]

## SUPPLEMENTAL MATERIAL

**Supplemental Table 1. Patient, Medical and Laboratory Characteristics of 511 Patients.**

| <b>Variable</b>                            | <b>n</b> | <b>Value</b> |
|--------------------------------------------|----------|--------------|
| Age at enrollment (years)                  | 511      | 11.8±3.4     |
| Gender, male                               | 310      | 61%          |
| Ethnicity                                  |          |              |
| White                                      | 412      | 81%          |
| Black                                      | 48       | 9%           |
| Asian                                      | 11       | 2%           |
| Other                                      | 39       | 8%           |
| Predominant ventricular morphology         |          |              |
| Left                                       | 251      | 49%          |
| Right                                      | 170      | 33%          |
| Indeterminant or mixed                     | 90       | 18%          |
| Staging cavopulmonary connection performed | 380      | 74%          |
| Age at Fontan procedure (years)            | 511      | 3.4±2.0      |
| Type of Fontan connection                  |          |              |
| Atriopulmonary                             | 69       | 14%          |
| Intracardiac lateral tunnel                | 305      | 60%          |
| Extracardiac lateral tunnel                | 63       | 12%          |
| Extracardiac conduit                       | 64       | 13%          |
| Other                                      | 10       | 2%           |
| Fenestration performed                     | 342      | 67%          |
| Interval from Fontan procedure (years)     | 511      | 8.5±3.4      |
| Current pacemaker                          | 64       | 13%          |

Continued on page 2

| Variable                                              | n   | Value                 |
|-------------------------------------------------------|-----|-----------------------|
| Number of current medications                         |     | 2 (1, 3 IQR)          |
| 0                                                     | 54  | 11%                   |
| 1                                                     | 129 | 25%                   |
| 2                                                     | 135 | 26%                   |
| 3                                                     | 97  | 19%                   |
| 4                                                     | 37  | 7%                    |
| 5                                                     | 29  | 6%                    |
| 6                                                     | 12  | 2%                    |
| 7                                                     | 7   | 1%                    |
| 8                                                     | 4   | 1%                    |
| 9                                                     | 2   | 0%                    |
| 10                                                    | 3   | 0%                    |
| 11                                                    | 1   | 0%                    |
| 12                                                    | 1   | 0%                    |
| Current cardiac medication(s)                         | 323 | 63%                   |
| Current morbidities                                   |     |                       |
| Stroke                                                | 10  | 3%                    |
| Thrombosis                                            | 38  | 7%                    |
| Protein-losing enteropathy                            | 20  | 4%                    |
| Arrhythmia                                            | 103 | 20%                   |
| Ventricular dysfunction                               | 86  | 17%                   |
| <b>Parent Report Child Health Questionnaire (CHQ)</b> |     |                       |
| CHQ Summary Scores                                    |     |                       |
| Physical functioning                                  | 511 | 45.3±11.9             |
| Psychosocial functioning                              | 511 | 47.2±10.8             |
| <b>Laboratory Testing</b>                             |     |                       |
| <b>Brain-Natrietic Peptide (BNP; pg/ml)</b>           | 483 | 24±40 (IQR 7.8, 25.6) |

Continued on page 3

| Variable                                                     | n   | Value     |
|--------------------------------------------------------------|-----|-----------|
| <b>Cardiopulmonary Exercise Testing</b>                      |     |           |
| Percent predicted maximum work rate (%)                      | 157 | 66.2±16.1 |
| Percent predicted VO <sub>2</sub> at peak (%)                | 157 | 66.8±14.8 |
| Percent predicted VO <sub>2</sub> at anaerobic threshold (%) | 153 | 77.4±21.8 |
| Percent predicted maximum oxygen pulse (%)                   | 157 | 88.3±22.4 |
| Resting oxygen saturation (%)                                | 156 | 94.1±4.2  |
| Chronotropic index                                           | 134 | 0.7±0.1   |
| <b>Echocardiography</b>                                      |     |           |
| End-systolic volume Z score                                  | 389 | 0.2±2.4   |
| End-diastolic volume Z score                                 | 389 | -0.6±1.9  |
| Total stroke volume Z score                                  | 389 | -1.0±1.8  |
| Total ejection fraction Z score                              | 389 | -0.8±2.0  |
| Total ventricular mass Z score                               | 383 | 1.0±2.3   |
| Total mass:end-diastolic volume ratio (gm/mL)                | 383 | 1.2±0.4   |
| Tei index                                                    | 345 | 0.6±0.2   |
| dP/dt <sub>ic</sub> (mm Hg/sec)                              | 337 | 1441±965  |
| AVV peak late diastolic velocity (m/sec)                     | 261 | 0.5±0.1   |
| Early:late AVV diastolic velocity (E/A)                      | 261 | 1.6±0.5   |
| Duration of AVV late diastolic inflow (msec)                 | 261 | 139±27    |
| Absolute systemic ventricular flow propagation rate (cm/sec) | 113 | 64±20     |
| Ratio of AV to tissue Doppler early diastolic flow velocity  | 229 | 8.5±4.1   |
| Tissue Doppler peak early diastolic velocity (cm/sec)        | 338 | 9.3±3.2   |
| Overall AV valve regurgitation                               | 385 |           |
| None                                                         | 97  | 25%       |
| Mild                                                         | 224 | 58%       |
| Moderate/severe                                              | 64  | 17%       |
| Semilunar valve regurgitation                                | 239 |           |
| None                                                         | 122 | 51%       |
| Mild                                                         | 97  | 41%       |
| Moderate                                                     | 20  | 8%        |

Continued on page 4

| Variable                                                                      | n   | Value   |
|-------------------------------------------------------------------------------|-----|---------|
| <b>Magnetic Resonance Imaging</b>                                             |     |         |
| Total end-systolic volume indexed to BSA <sup>1.3</sup> (mL/m <sup>2</sup> )  | 155 | 37±15   |
| Total end-diastolic volume indexed to BSA <sup>1.3</sup> (mL/m <sup>2</sup> ) | 155 | 86±25   |
| Total stroke volume (mL)                                                      | 155 | 65±25   |
| Total ejection fraction (%)                                                   | 155 | 57±9    |
| Cardiac output (L/min)                                                        | 153 | 5.1±1.7 |
| Total ventricular mass indexed to BSA <sup>1.3</sup> (gm/m <sup>2</sup> )     | 155 | 71±20   |
| Total mass/end-diastolic volume ratio (gm/mL)                                 | 155 | 0.9±0.3 |

AV, atrioventricular; AVV, atrioventricular valve; BSA, body surface area; cm, centimeters; dP, change in pressure; dt, change in time; gm, grams; IQR, interquartile range; L, liters; m, meters; min, minute; mL, milliliters; mm Hg, millimeters Mercury; PLE, protein-losing enteropathy; sec, second; VO<sub>2</sub>, oxygen consumption

\*values represent frequency, median with interquartile range, or mean and standard deviation

\*\*after logarithmic transformation

## **PEDIATRIC HEART NETWORK FONTAN CROSS-SECTIONAL STUDY INVESTIGATORS**

National Heart, Lung, and Blood Institute: Gail Pearson, Mario Stylianou, Judith Massicot-Fisher, Marsha Mathis, Victoria Pemberton

Data Coordinating Center: *New England Research Institutes*, Lynn Sleeper, Steven Colan, Paul Mitchell, Dianne Gallagher, Patti Nash, Gloria Klein, Minmin Lu

Network Chair: Lynn Mahony, *University of Texas Southwestern Medical Center*

Clinical Site Investigators: *Children's Hospital Boston*, Jane Newburger (PI), Stephen Roth, Roger Breitbart, Jonathan Rhodes, Jodi Elder, Ellen McGrath; *Children's Hospital of New York*, Welton M. Gersony (PI), Seema Mital, Beth Printz, Ashwin Prakash, Darlene Servedio; *Children's Hospital of Philadelphia*, Victoria Vetter (PI), Bernard J. Clark, Mark Fogel, Steven Paridon, Jack Rychik, Margaret Harkins, Jamie Koh; *Duke University*, Page A. W. Anderson (PI), Rene Herlong, Lynne Hurwitz, Jennifer S. Li, Ann Marie Nawrocki; *Medical University of South Carolina*, J. Philip Saul (PI), Andrew M. Atz, Andrew D. Blaufox, Girish Shirali, Jon Lucas, Amy Blevins; *Primary Children's Medical Center, Salt Lake City, Utah*, LuAnn Minich (PI), Richard Williams, Linda Lambert, Michael Puchalski; *Hospital for Sick Children, Toronto*, Brian McCrindle (PI), Timothy Bradley, Kevin Roman, Jennifer Russell, Shi-Joon Yoo, Elizabeth Radojewski, Nancy Slater

### Core Laboratories:

*Cardiac MRI*, Children's Hospital Boston: *Tal Geva (Director); Andrew J. Powell*

*Echocardiography*, Children's Hospital Boston: *Steven Colan (Director), Marcy Schwartz, Renee Margossian*

Protocol Review Committee: Michael Artman, Chair; Dana Connolly, Timothy Feltes, Julie Johnson, Jeffrey Krischer, G. Paul Matherne.

Data and Safety Monitoring Board: John Kugler, Chair; Kathryn Davis, David J. Driscoll, Mark Galantowicz, Sally A. Hunsberger, Thomas J. Knight, Catherine L. Webb, Lawrence Wissow.
